CORRECTION

# Correction: Ribosomal Stalk Protein Silencing Partially Corrects the $\Delta$ F508-CFTR Functional Expression Defect

The *PLOS Biology* Staff

## Notice of Republication

This article was republished on October 11th, 2016, to correct a technical error in the author byline in the online version of this article. The suffix “IV” for author John L. Hartman IV was incorrectly tagged as part of his surname.

## Reference

1. Veit G, Oliver K, Apaja PM, Perdomo D, Bidaud-Meynard A, Lin S-T, et al. (2016) Ribosomal Stalk Protein Silencing Partially Corrects the  $\Delta$ F508-CFTR Functional Expression Defect. *PLoS Biol* 14(5): e1002462. doi: [10.1371/journal.pbio.1002462](https://doi.org/10.1371/journal.pbio.1002462) PMID: [27168400](https://pubmed.ncbi.nlm.nih.gov/27168400/)

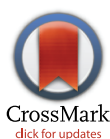

## OPEN ACCESS

**Citation:** The *PLOS Biology* Staff (2016) Correction: Ribosomal Stalk Protein Silencing Partially Corrects the  $\Delta$ F508-CFTR Functional Expression Defect. *PLoS Biol* 14(11): e1002574. doi:10.1371/journal.pbio.1002574

**Published:** November 2, 2016

**Copyright:** © 2016 The PLOS Biology Staff. This is an open access article distributed under the terms of the [Creative Commons Attribution License](https://creativecommons.org/licenses/by/4.0/), which permits unrestricted use, distribution, and reproduction in any medium, provided the original author and source are credited.
